# Supplementary material for: Quinoa (Chenopodium quinoa Willd.): Genetic Diversity According to ISSR and SCoT Markers, Relative Gene Expression, and Morpho-Physiological Variation under Salinity Stress
Source: MDPI journal article supplement (doi:10.3390/plants10122802), 2021-12-17
Supplement: s1 [file s1]

**Table S1.** Sequences of ISSR and SCoT primers used in studying genetic diversity of quinoa.

|      | Markers | Sequences 5'–3'    | Annealing Temperature<br>°C |
|------|---------|--------------------|-----------------------------|
| ISSR | ISSR 1  | (CT) 8 GC          | 55                          |
|      | ISSR 2  | (GA)6CC            |                             |
|      | ISSR 3  | (CAC)3GC           |                             |
|      | ISSR 4  | (GTG)3GC           |                             |
|      | ISSR 5  | CCA(CT)8           |                             |
|      | ISSR 6  | (CT)8G             |                             |
|      | ISSR 7  | (AG)8G             |                             |
|      | ISSR 8  | (AG)8C             |                             |
|      | ISSR 9  | (GA)8T             |                             |
|      | ISSR 10 | GAG(CAA)5          |                             |
| SCoT | SCoT 1  | CAATGGCTACCACTAGCC | 50                          |
|      | SCoT 2  | CAATGGCTACCACTAACG |                             |
|      | SCoT 3  | CAATGGCTACCACTAGCG |                             |
|      | SCoT 4  | ACAATGGCTACCACTAGG |                             |
|      | SCoT 5  | ACAATGGCTACCACTACC |                             |
|      | SCoT 6  | ACAATGGCTACCACCATC |                             |
|      | SCoT 7  | CCATGGCTACCACTAGCA |                             |
|      | SCoT 8  | CCATGGCTACCACTAGCG |                             |
|      | SCoT 9  | CAACAATGGCTACCACCG |                             |
|      | SCoT 10 | CCATGGCTACCACCGCCC |                             |

**Table S2.** Primer information used for gene expression analysis in *Chenopodium quinoa*.

| Gene  | F                         | Length | R                        | Length |
|-------|---------------------------|--------|--------------------------|--------|
| SOS1  | CCTCATGATGCTTCGACAA       | 20     | CCGAGTCAAGTGCTTCATCA     | 20     |
| NHX1  | ATCAGTTTACGAGGTCAGGGCACA  | 24     | GAGGCTTTGTCAGCAACCCAAACA | 24     |
| GAPDH | GGTTACAGTCATTCAGACACCATCA | 25     | AACAAAGGGAGCCAAGCAGTT    | 21     |

**Table S3.** Similarity correlation among selected genotypes of quinoa.

| <b>Genotypes</b> | M-28  | Q-37  | S-10  | Regeolone-3 | Line -6 |
|------------------|-------|-------|-------|-------------|---------|
| M-28             | 1     |       |       |             |         |
| Q-37             | 0.602 | 1     |       |             |         |
| S-10             | 0.497 | 0.617 | 1     |             |         |
| Regeolone-3      | 0.467 | 0.563 | 0.657 | 1           |         |
| Line -6          | 0.44  | 0.476 | 0.497 | 0.593       | 1       |

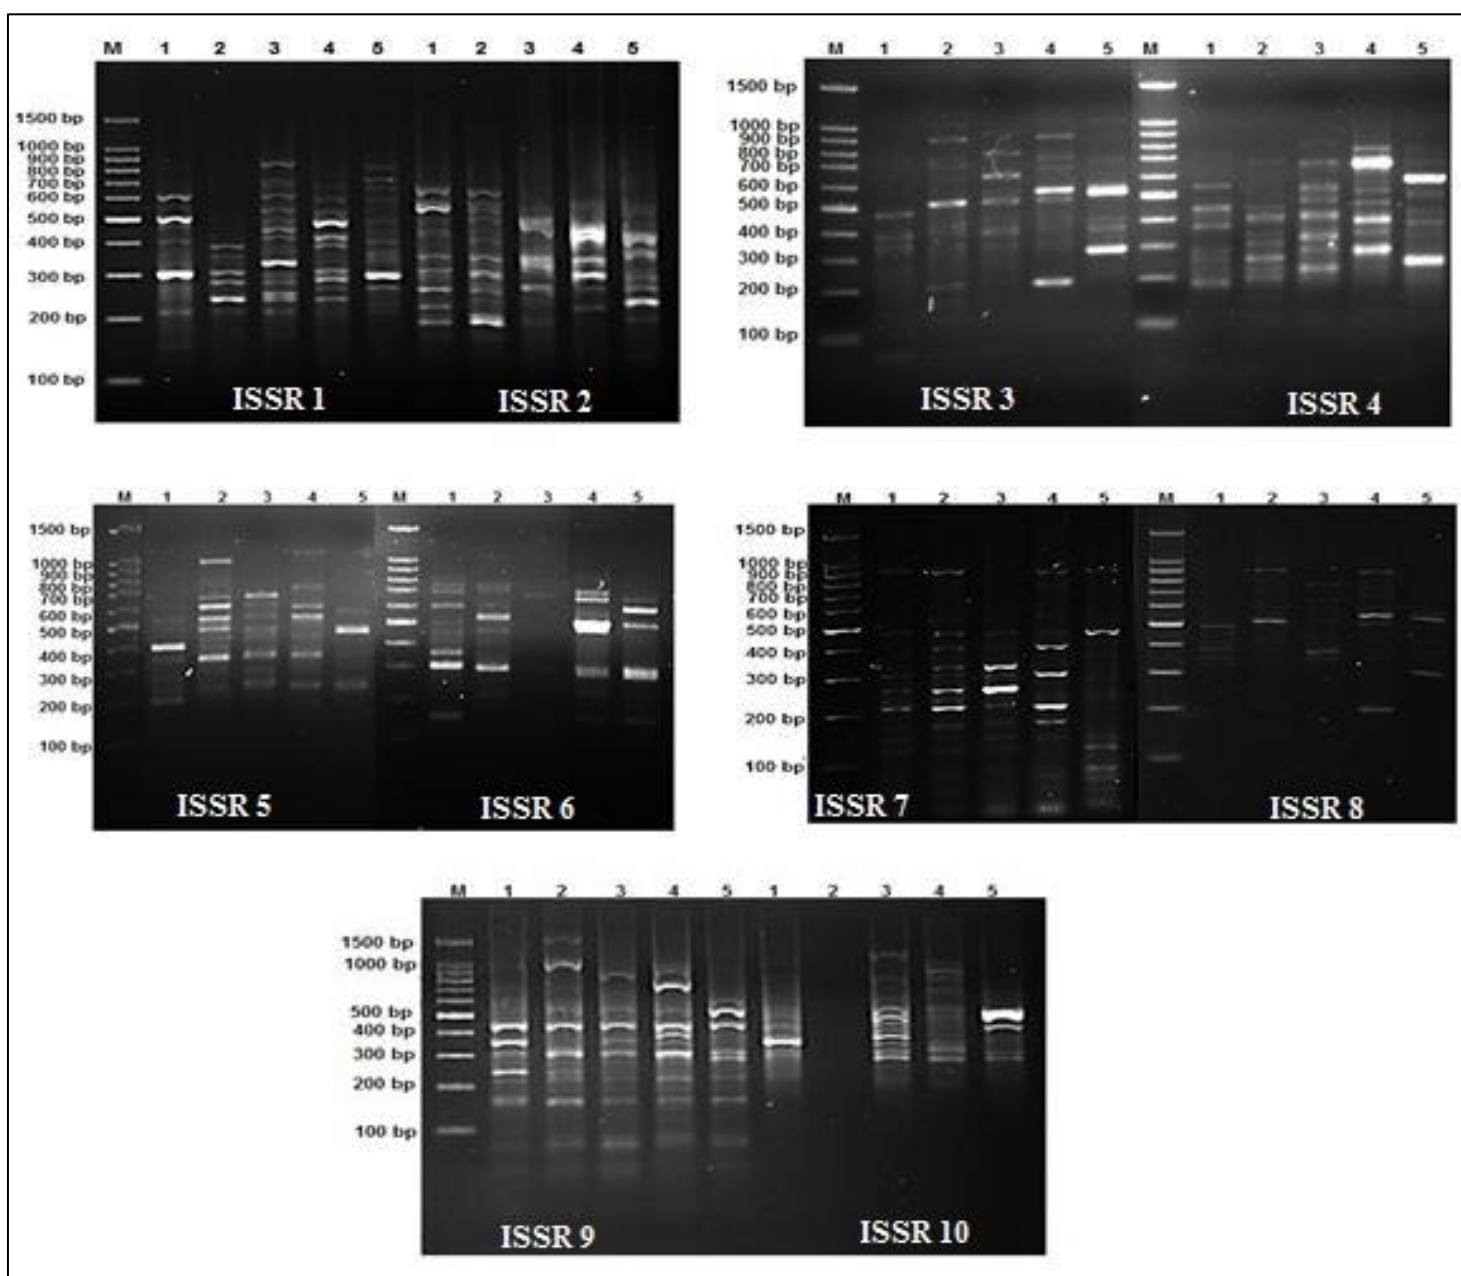

**Figure S1.** Amplification products generated from ten ISSR primers, 1= M-28, 2= Q-37, 3= S-10, 4= Regeolone-3, 5= Line -6.

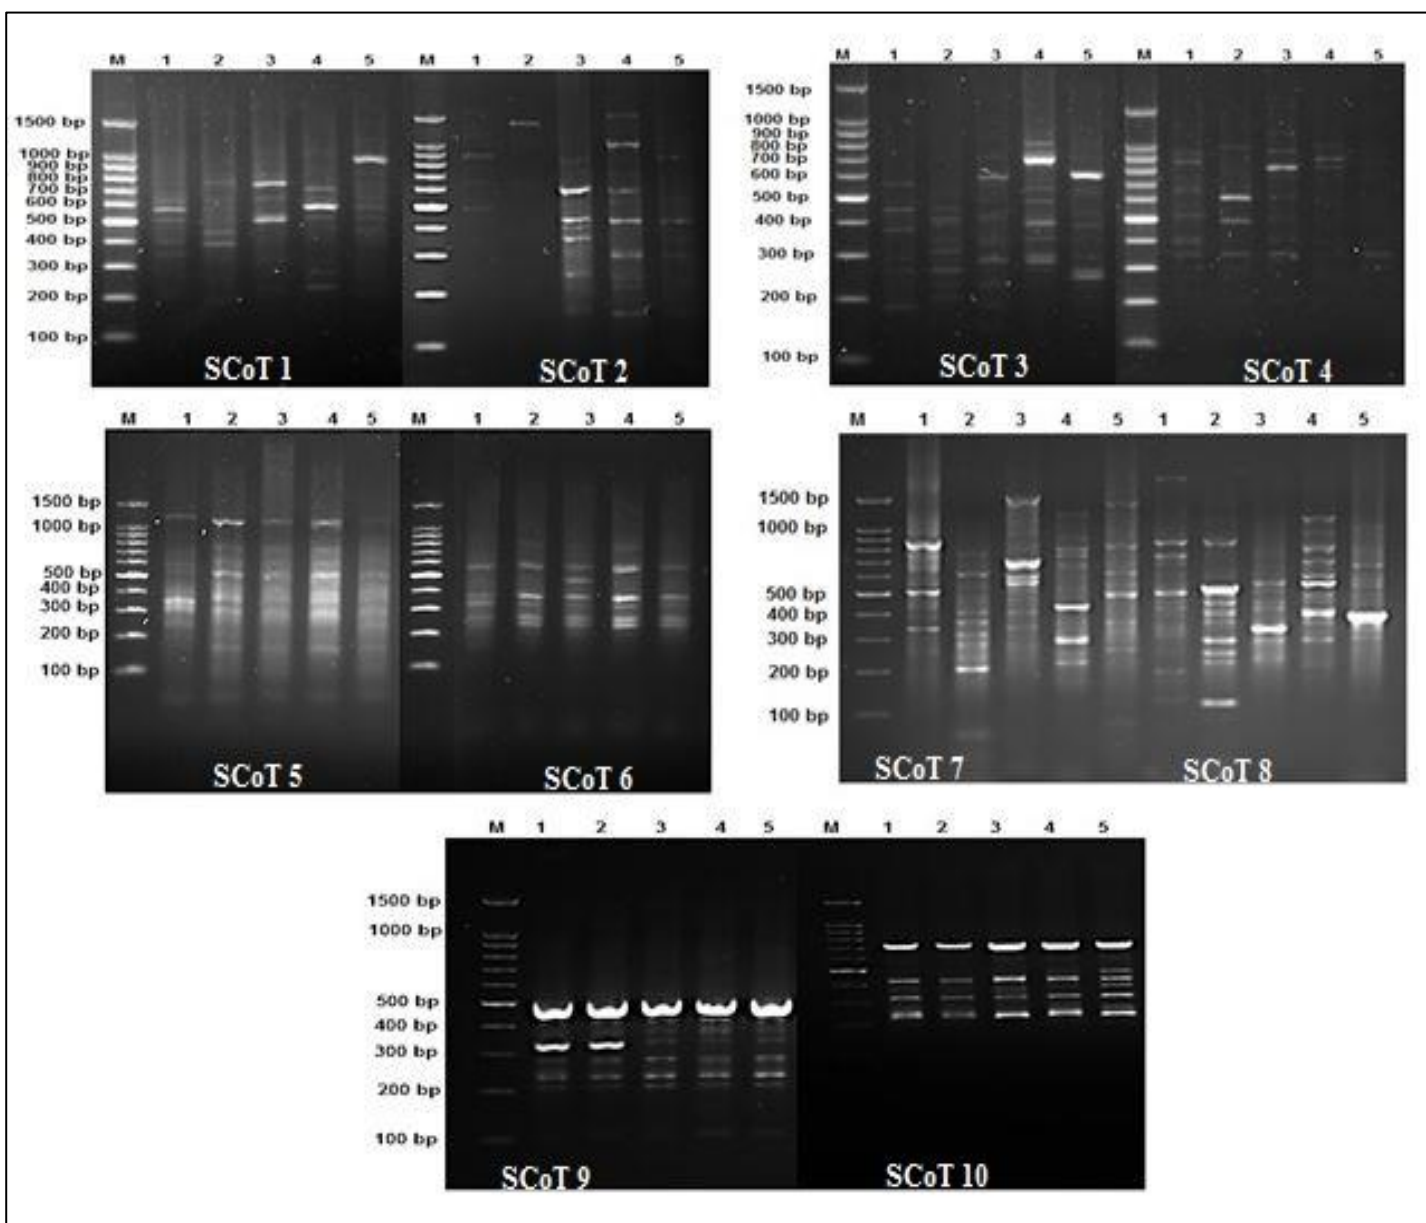

**Figure S2.** Amplification products generated from ten SCoT primers, 1= M-28, 2= Q-37, 3= S-10, 4= Regeolone-3, 5= Line -6.

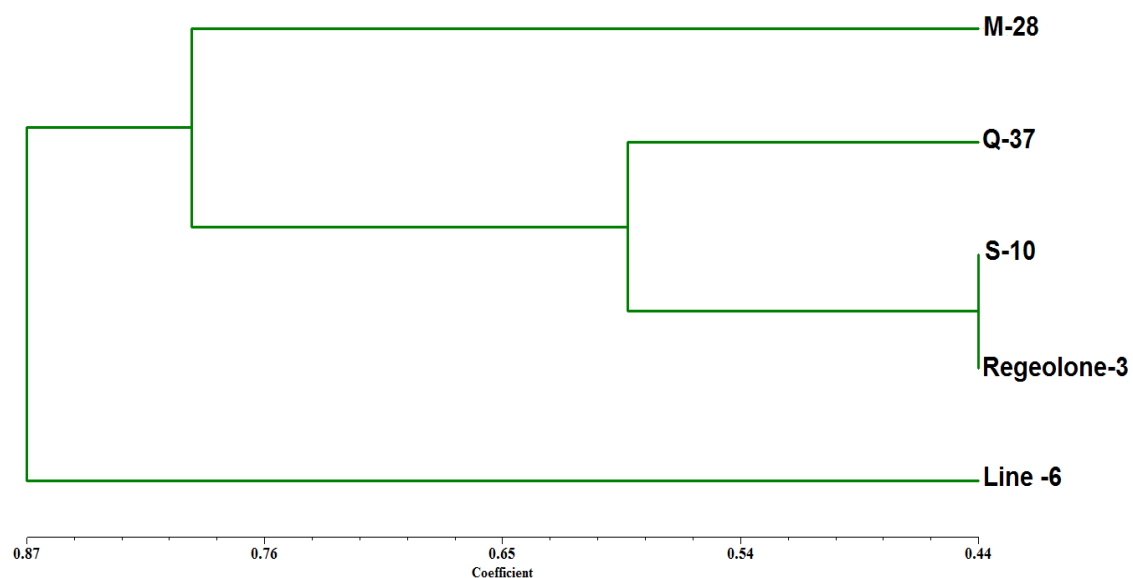

**Figure S3.** Cluster Dendrogram of the studied quinoa genotypes based on UPGMA analysis using the similarity matrix generated by ISSR and SCoT markers.

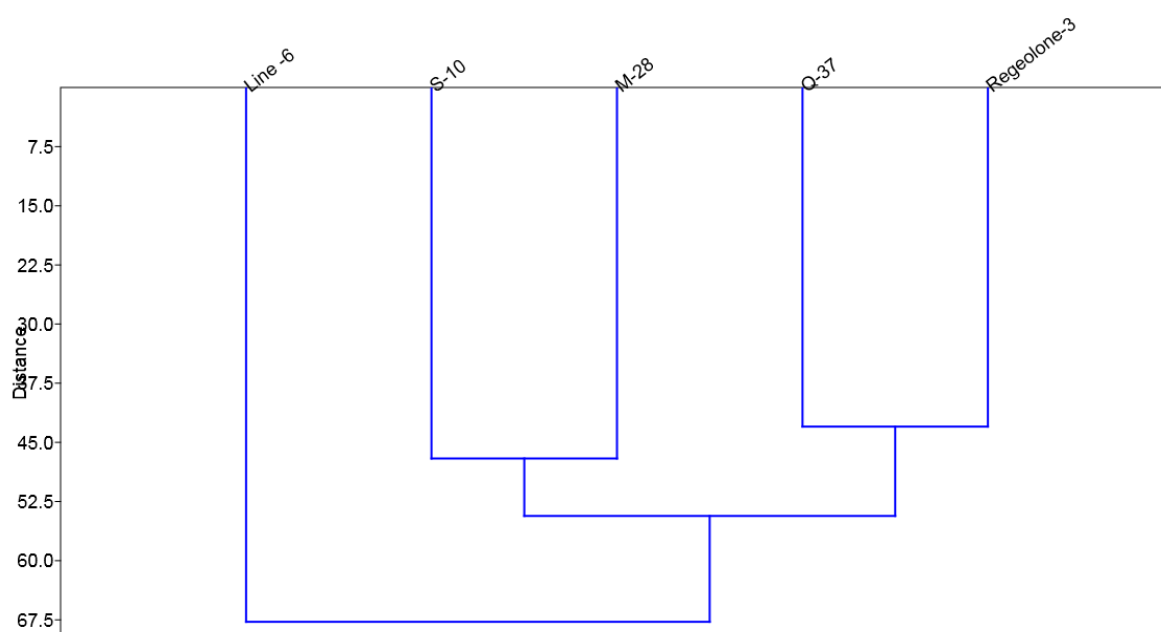

**Figure S4** Cluster Dendrogram of the studied quinoa genotypes based on UPGMA analysis using the similarity matrix generated from morpho-physiological traits and molecular attributes (ISSR & SCoT).
